# Supplementary material for: Adaptive Gene Content and Allele Distribution Variations in the Wild and Domesticated Populations of Saccharomyces cerevisiae
Source: PubMed Central journal article supplement (PMC7925643; doi:10.3389/fmicb.2021.631250), 2021-02-17
Supplement: Image_1.pdf [file Image_1.pdf]

Figure S1

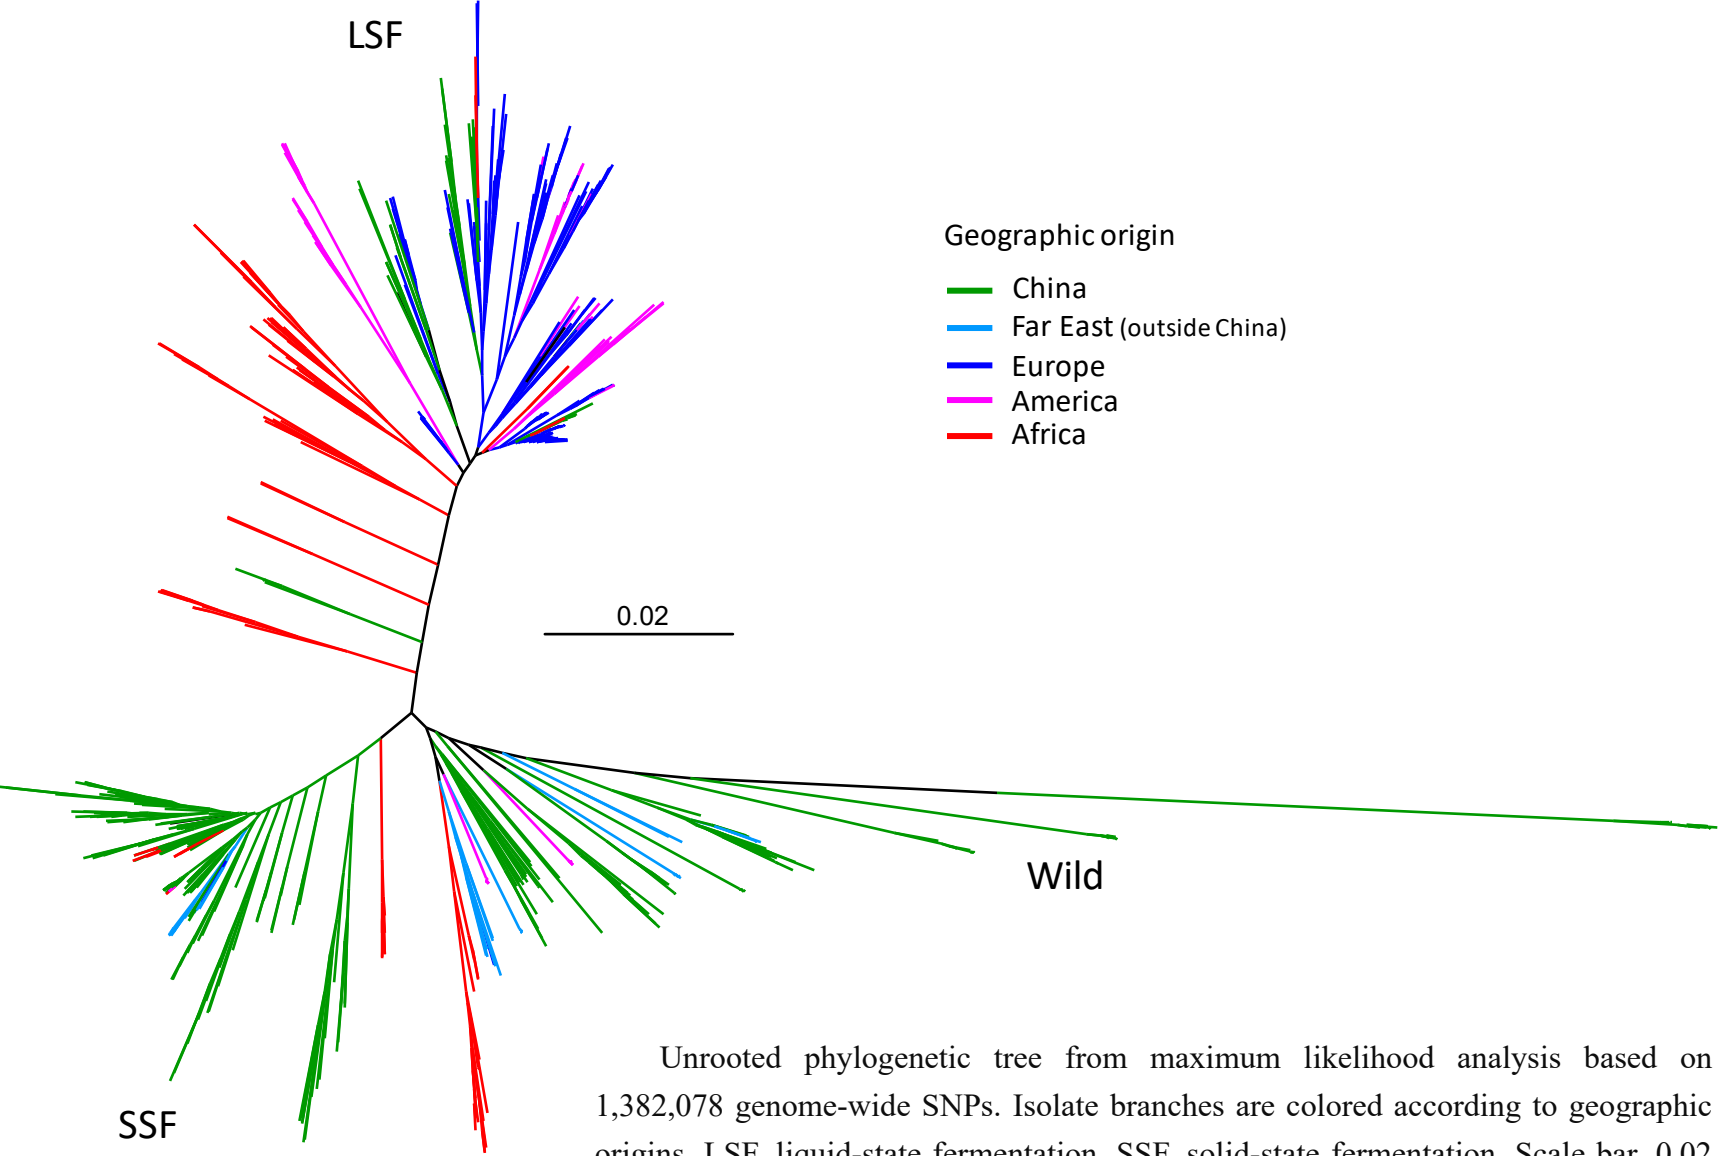

Unrooted phylogenetic tree from maximum likelihood analysis based on 1,382,078 genome-wide SNPs. Isolate branches are colored according to geographic origins. LSF, liquid-state fermentation. SSF, solid-state fermentation. Scale bar, 0.02 substitutions per site.
