# Supplementary material for: Adaptive Gene Content and Allele Distribution Variations in the Wild and Domesticated Populations of Saccharomyces cerevisiae
Source: PubMed Central journal article supplement (PMC7925643; doi:10.3389/fmicb.2021.631250), 2021-02-17
Supplement: Image_3.pdf [file Image_3.pdf]

Figure S3

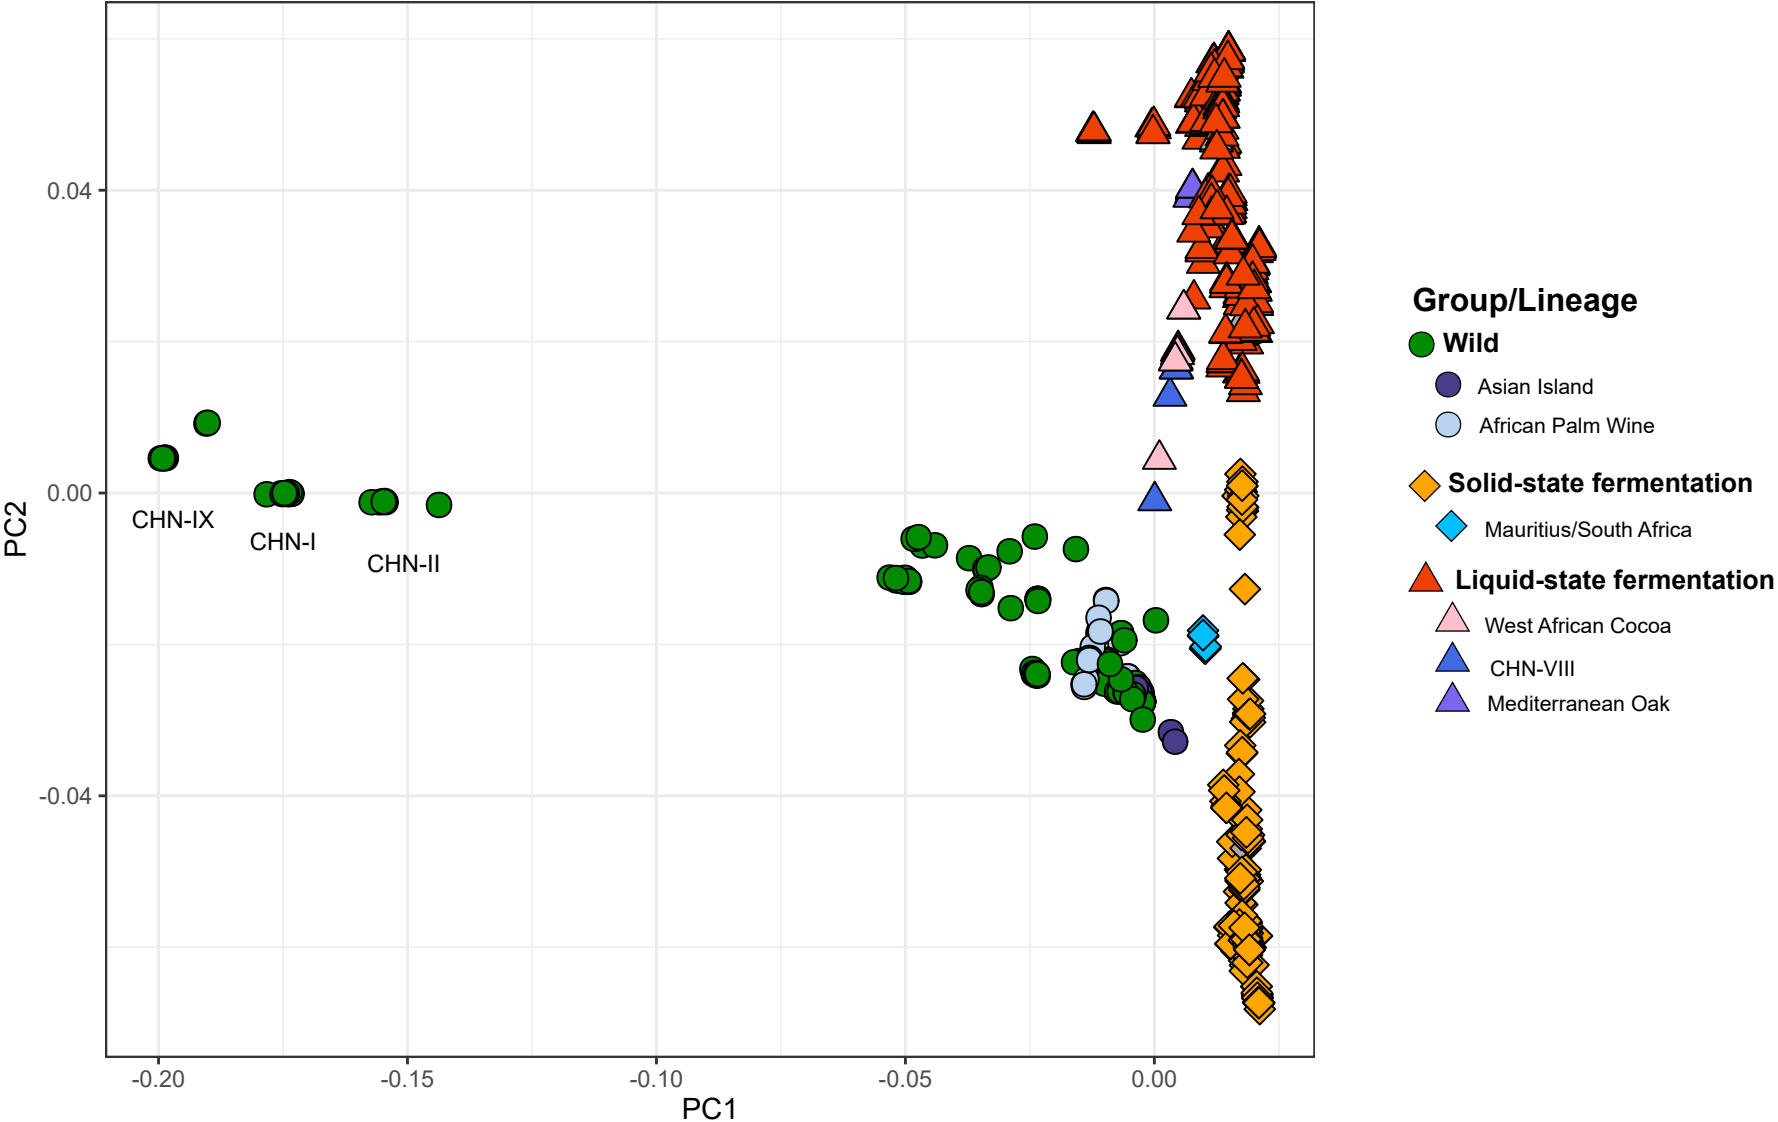

Principal component analysis (PCA) of genome wide SNPs from 612 wild and domesticated isolates of *S. cerevisiae* with worldwide origins
