# Supplementary material for: Adaptive Gene Content and Allele Distribution Variations in the Wild and Domesticated Populations of Saccharomyces cerevisiae
Source: PubMed Central journal article supplement (PMC7925643; doi:10.3389/fmicb.2021.631250), 2021-02-17
Supplement: Image_4.pdf [file Image_4.pdf]

Figure S4

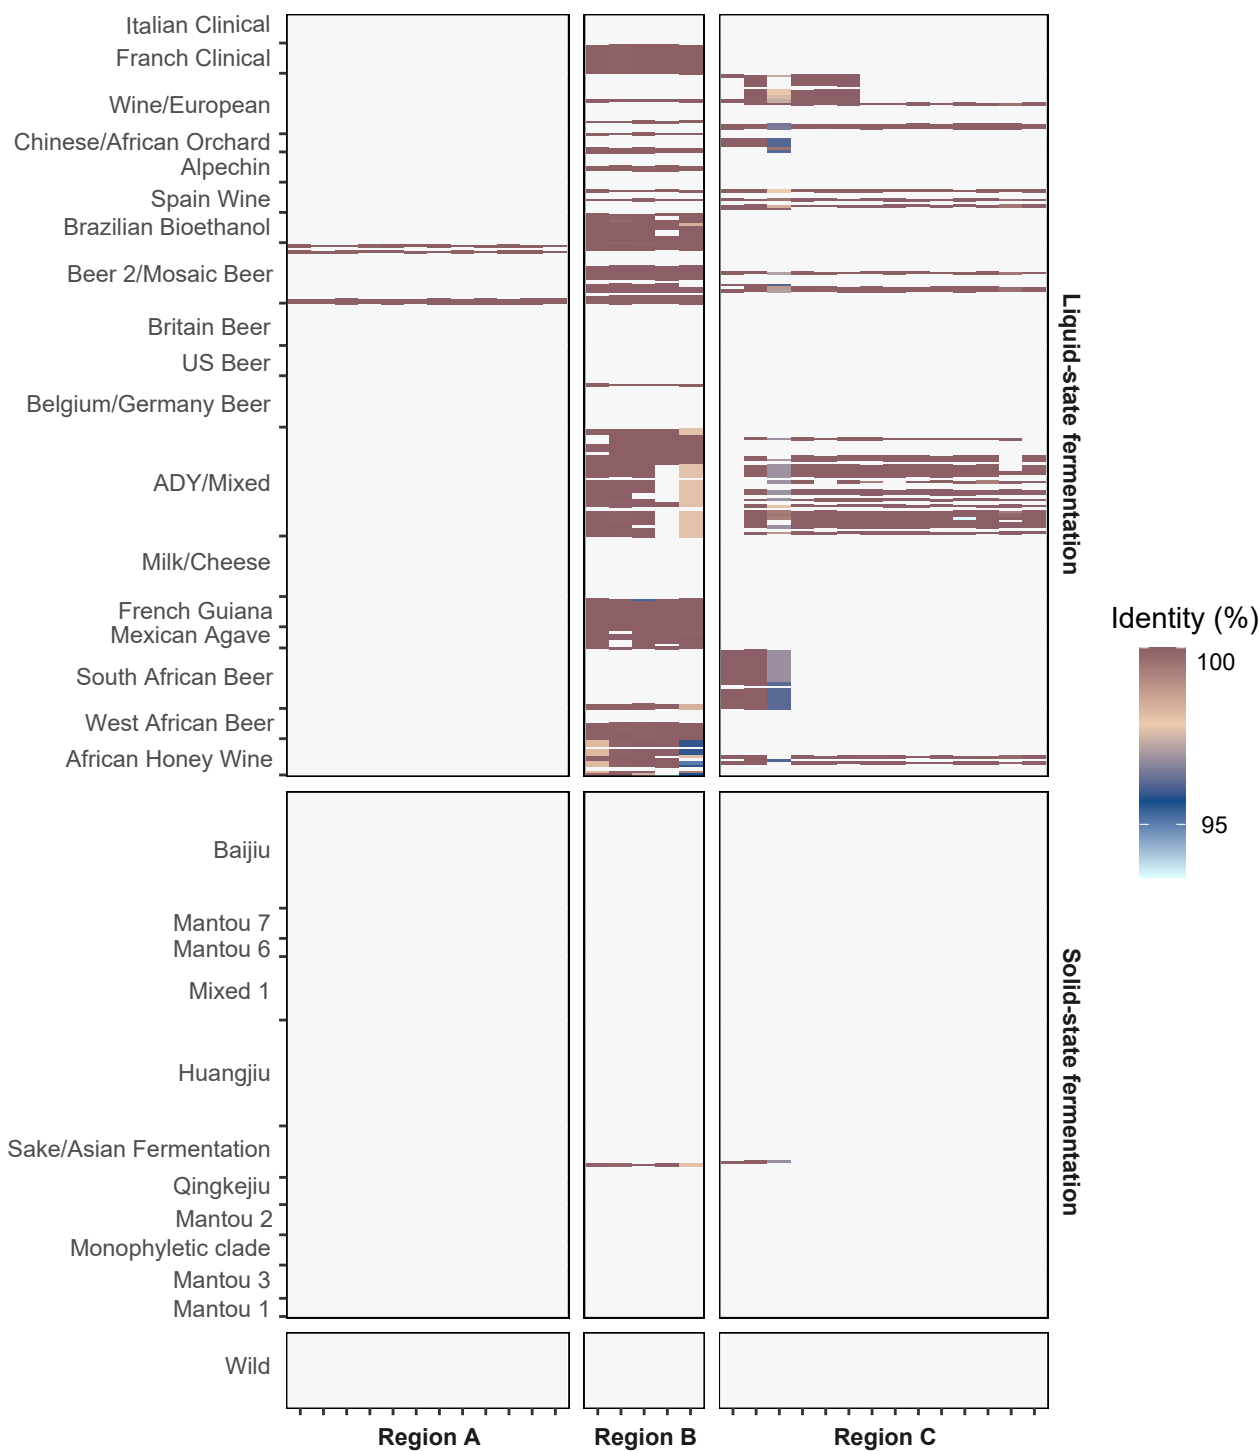

Distribution of genes in Regions A, B, and C in different groups and lineages of *S. cerevisiae*. The wild group are collapsed because the genes are absent in all the wild isolates compared. The sequence identity of each gene represented by a fragment at the bottom to the corresponding gene in each isolate is shown according to the scale on the right
