# Supplementary material for: Adaptive Gene Content and Allele Distribution Variations in the Wild and Domesticated Populations of Saccharomyces cerevisiae
Source: PubMed Central journal article supplement (PMC7925643; doi:10.3389/fmicb.2021.631250), 2021-02-17
Supplement: Image_5.pdf [file Image_5.pdf]

Figure S5

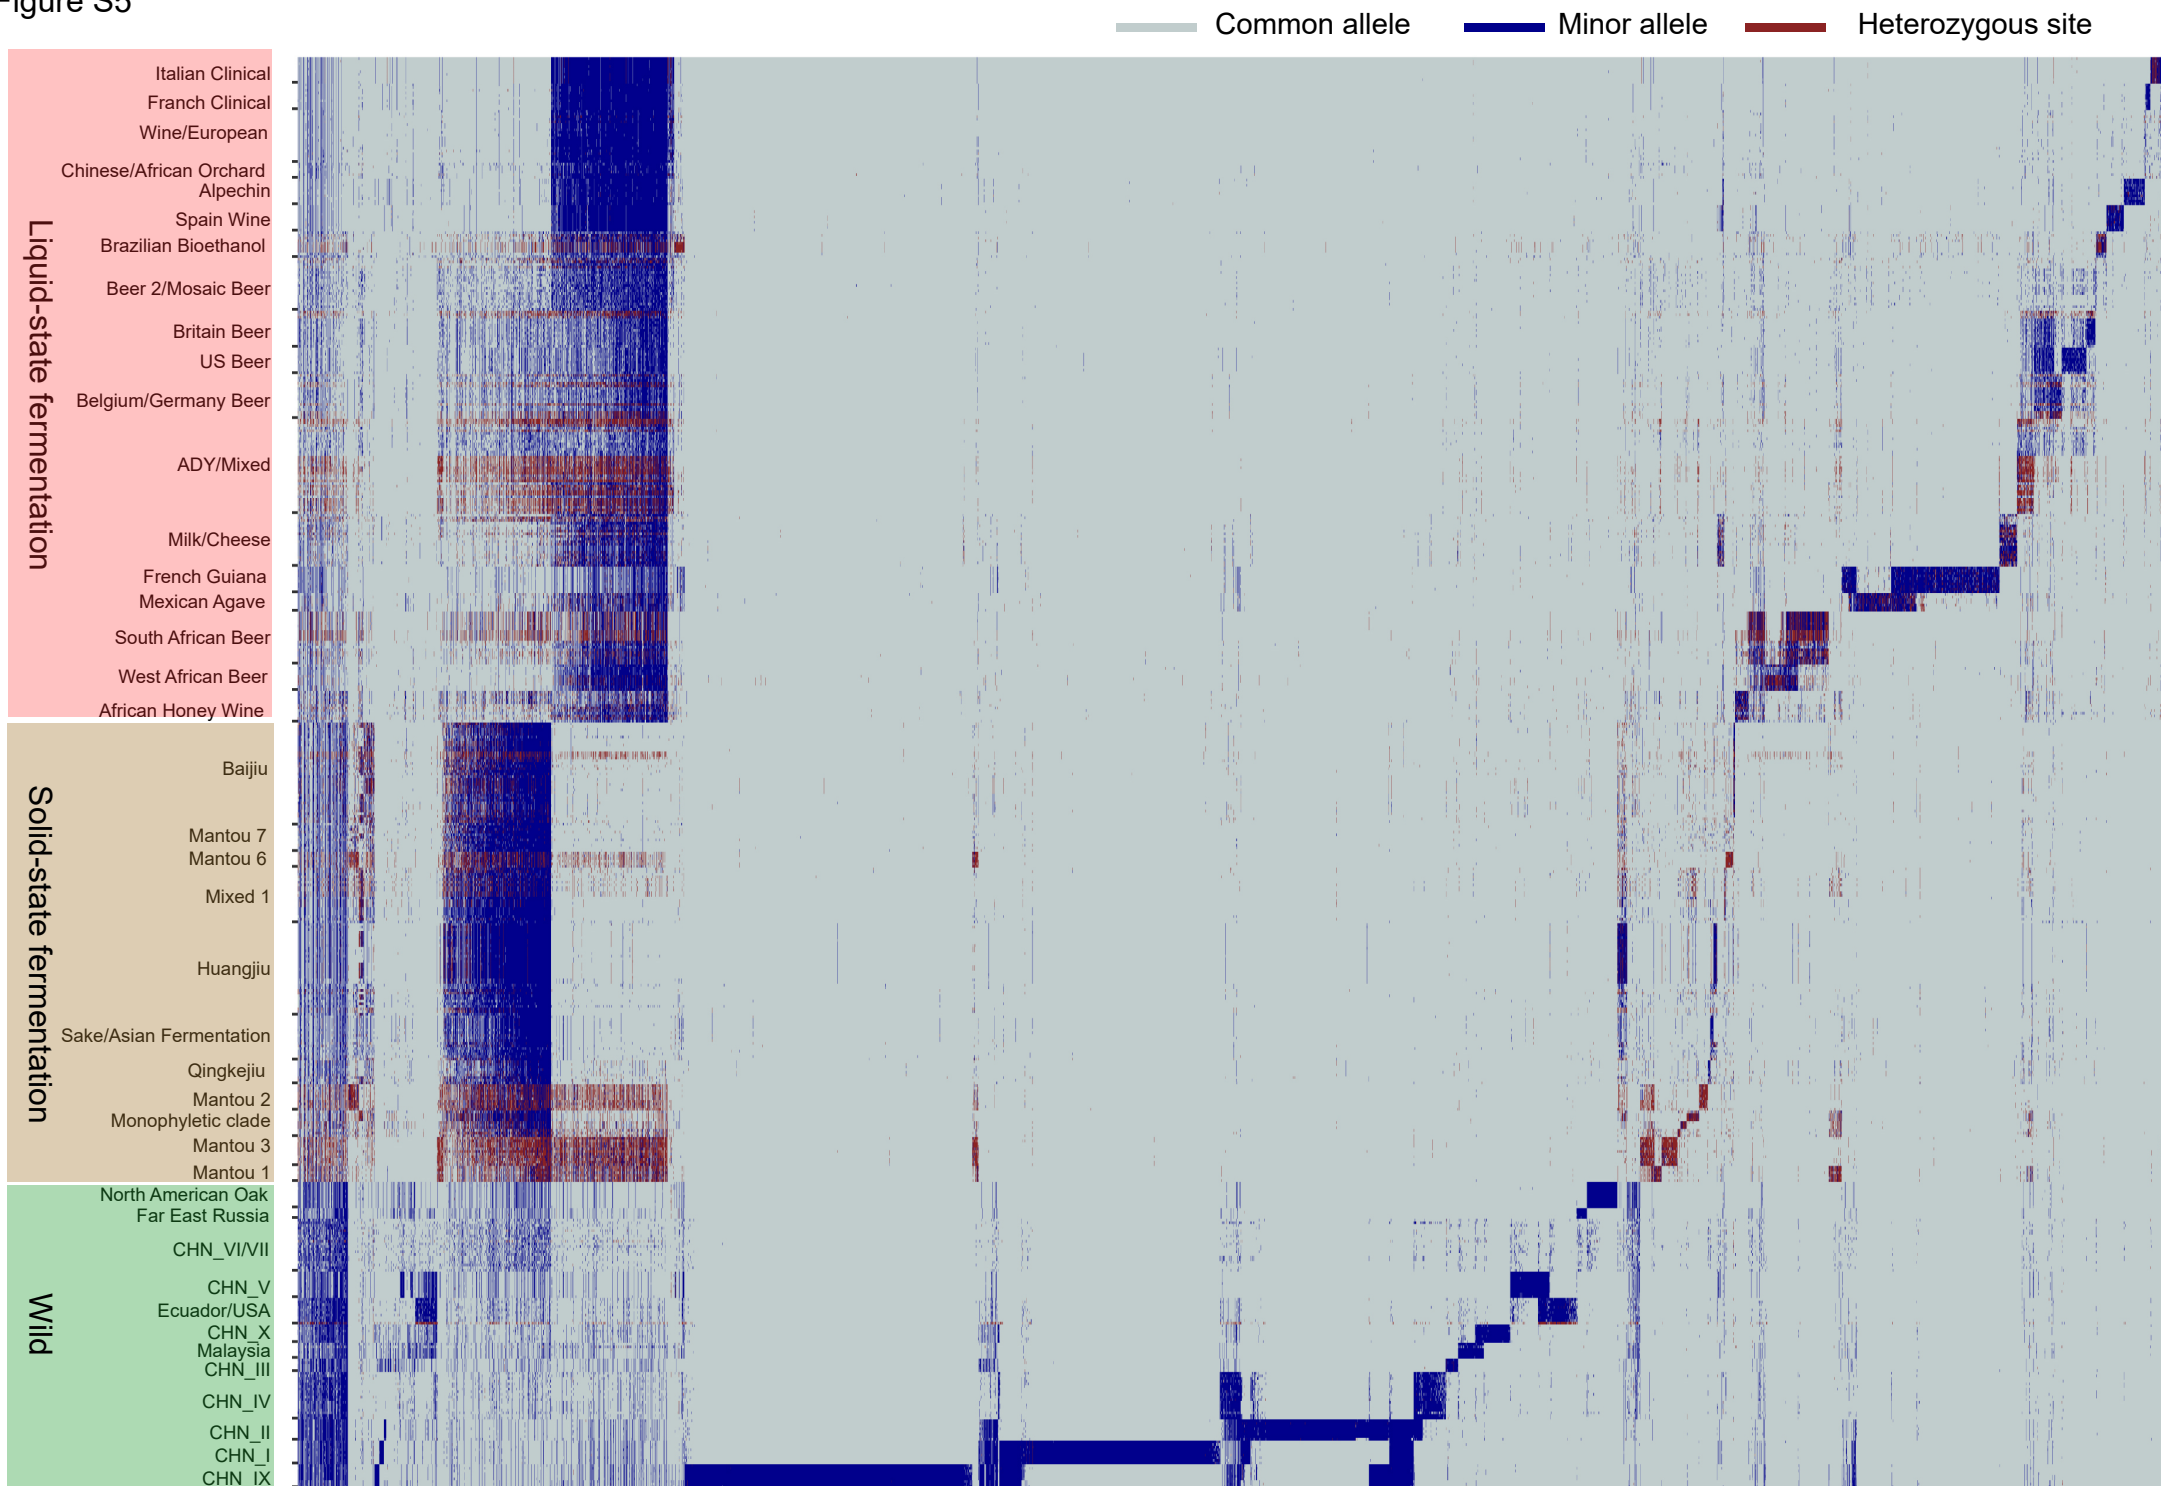

Distribution of 7,348 SNPs in 612 wild and domesticated *S. cerevisiae* isolates with worldwide origins.

The SNPs are filter from 10,000 randomly selected SNPs by excluding the sites that exist in less than 80% isolates of any lineages.
