# Supplementary material for: Adaptive Gene Content and Allele Distribution Variations in the Wild and Domesticated Populations of Saccharomyces cerevisiae
Source: Front Microbiol. 2021 Feb 17;12:631250. doi: 10.3389/fmicb.2021.631250 (PMC7925643; doi:10.3389/fmicb.2021.631250)
Supplement: Supplementary file 1 [file Table_1.xlsx]

## Sheet: Sheet1
Table S1 S. cerevisiae isolates compared, their ecological and geographic origins and heterozygosity
Group	Lineage	Lineage ID/ Sub-lineage	Strain	Source	Location	Coutry	Heterozygosity (%)	Reference	Genome_accession	Biosample_accession	Raw data accession
Wild	CHN-IX (Hubei/Taiwan forest)	W1	CEI	Soil	Taiwan	China	0.00272686	Peter et al., 2018
			CEG	Soil	Taiwan	China	0.00290524	Peter et al., 2018
			AMH	Soil	Sinyi, Nantou, Taiwan	China	0.00219803	Peter et al., 2018
			JXXY10.1	Bark, primeval forest	Shennongjia, Hubei	China	0.0049	Duan et al., 2018
			JXXY16.1	Bark, primeval forest	Shennongjia, Hubei	China	0.0044	Duan et al., 2018
			XXY26L.1	Bark, primeval forest	Shennongjia, Hubei	China	0.0053	Duan et al., 2018
			XXYS1.4	Bark, primeval forest	Shennongjia, Hubei	China	0.0049	Duan et al., 2018
			XXY30L.2	Bark, primeval forest	Shennongjia, Hubei	China	0.0057	Duan et al., 2018
			XXYS14.1	Bark, primeval forest	Shennongjia, Hubei	China	0.0045	Duan et al., 2018
	CHN-I (Hainan/Fujian forest)	W2	HN5	Rotten wood, primeval forest	Bawangling Mountain, Hainan	China	0.0057	Duan et al., 2018
			HN7	Rotten wood, primeval forest	Bawangling Mountain, Hainan	China	0.0058	Duan et al., 2018
			HN6	Rotten wood, primeval forest	Bawangling Mountain, Hainan	China	0.0075	Duan et al., 2018
			HN2	Rotten wood, primeval forest	Diaoluo Mountain, Hainan	China	0.0049	Duan et al., 2018
			HN3	Rotten wood, primeval forest	Diaoluo Mountain, Hainan	China	0.005	Duan et al., 2018
			HN1	Rotten wood, primeval forest	Diaoluo Mountain, Hainan	China	0.007	Duan et al., 2018
			FJ5	Bark of Castanea mollissima, planted tree	Wuyi Mountain, Fujian	China	0.0066	Duan et al., 2018
			FJ8	Bark of Cyclobalanopsis nubium, primeval forest	Wuyi Mountain, Fujian	China	0.0068	Duan et al., 2018
			FJ7	Bark of Hovenia acerba, primeval forest	Wuyi Mountain, Fujian	China	0.0056	Duan et al., 2018
	CHN-II (Shaanxi forest)	W3	SX7	Bark of a Fagaceae tree, primeval forest	Qinling Mountain, Shaanxi	China	0.0059	Duan et al., 2018
			SX1	Bark of a Fagaceae tree, primeval forest	Qinling Mountain, Shaanxi	China	0.0041	Duan et al., 2018
			SX4	Bark of a Fagaceae tree, primeval forest	Qinling Mountain, Shaanxi	China	0.0054	Duan et al., 2018
			SX5	Bark of Quercus fabri, primeval forest	Qinling Mountain, Shaanxi	China	0.0075	Duan et al., 2018
			SX6	Bark of Quercus fabri, primeval forest	Qinling Mountain, Shaanxi	China	0.0067	Duan et al., 2018
			SX8	Bark of Quercus fabri, primeval forest	Qinling Mountain, Shaanxi	China	0.0052	Duan et al., 2018
			SX2	Bark of a Fagaceae tree, primeval forest	Qinling Mountain, Shaanxi	China	0.0049	Duan et al., 2018
			SX3	Bark of Carya sp., primeval forest	Qinling Mountain, Shaanxi	China	0.0049	Duan et al., 2018
	CHN-IV (Beijing/Far East forest)	W4	HLJ1	Bark of Quercus mongokica, secondary forest	Dongling Mountain, Beijing	China	0.0083	Duan et al., 2018
			JL5	Bark of Pyrussp., orchard	Dongling Mountain, Beijing	China	0.0061	Duan et al., 2018
			CCS	Tree	Japan	Japan	0.00311079	Peter et al., 2018
			SACE_YCR	Tree	Japan	Japan	0.00324465	Peter et al., 2018
			ACQ	Wine	Russia	Russia	0.00303516	Peter et al., 2018
			CCN	Fruit	Russian Far East	Russia	0.00334213	Peter et al., 2018
			CDL	Tree	Vladivostok, Russian Far East	Russia	0.00331249	Peter et al., 2018
			BJ15	Bark of Quercus wutaishanica, secondary forest	Dongling Mountain, Beijing	China	0.0053	Duan et al., 2018
			BJ22	Bark of Carya cathayensis, secondary forest	Dongling Mountain, Beijing	China	0.0102	Duan et al., 2018
			BJ27	Grape, orchard	Dongling Mountain, Beijing	China	0.0044	Duan et al., 2018
			BJ26	Grape, orchard	Dongling Mountain, Beijing	China	0.0061	Duan et al., 2018
			BJ18	Bark of Quercus wutaishanica, secondary forest	Dongling Mountain, Beijing	China	0.0062	Duan et al., 2018
			BJ24	Bark of Ulmus macrocarpa, secondary forest	Dongling Mountain, Beijing	China	0.0063	Duan et al., 2018
			BJ3	Grape, orchard	Shunyi, Beijing	China	0.0046	Duan et al., 2018
			BJ8	Bark of Quercus mongokica, secondary forest	Wuling Mountain, Beijing	China	0.0057	Duan et al., 2018
			BJ14	Forest soil, secondary forest	Wuling Mountain, Beijing	China	0.0065	Duan et al., 2018
			BAK	Tree	Dongling Mountain, Beijing	China	0.00310796	Peter et al., 2018
			BAI	Fruit	Changping, Beijing	China	0.00284672	Peter et al., 2018
	Mosaic 1 (Japan forest)		CCQ	Tree	Japan	Japan	0.00341894	Peter et al., 2018
			CCR	Tree	Japan	Japan	0.00325272	Peter et al., 2018
	CHN-III (Hainan forest)	W5	HN11	Rotten wood, primeval forest	Jianfengling Mountain, Hainan	China	0.0058	Duan et al., 2018
			HN10	Rotten wood, primeval forest	Wuzhi Mountain, Hainan	China	0.0081	Duan et al., 2018
			HN8	Rotten wood, primeval forest	Wuzhi Mountain, Hainan	China	0.0073	Duan et al., 2018
			HN9	Rotten wood, primeval forest	Wuzhi Mountain, Hainan	China	0.0064	Duan et al., 2018
			HN19	Bark of a Fagaceae tree, primeval forest	Wuzhi Mountain, Hainan	China	0.0075	Duan et al., 2018
	Malaysian	W6	BMA	Tree	Malaysia	Malaysia	0.00268264	Peter et al., 2018
			AKM	Tree	Malaysia	Malaysia	0.00212107	Peter et al., 2018
			BMB	Tree	Malaysia	Malaysia	0.00265369	Peter et al., 2018
			BMC	Tree	Malaysia	Malaysia	0.00275553	Peter et al., 2018
			SACE_YCY	Tree	Malaysia	Malaysia	0.0275733	Peter et al., 2018
			SACE_MAL	Insect	Telok Senangin, Malaysia	Malaysia	0.000873121	Peter et al., 2018
	CHN-X (South & Central China forest)	W7	FJSA40.2	Bark, primeval forest	Fanjing Mountain, Guizhou	China	0.0051	Duan et al., 2018
			GT99.1	Bark, primeval forest	Gutian Mountain, Zhejiang	China	0.0037	Duan et al., 2018
			GT39.1	Bark, primeval forest	Gutian Mountain, Zhejiang	China	0.0028	Duan et al., 2018
			JXXY1.1	Bark, primeval forest	Shennongjia, Hubei	China	0.003	Duan et al., 2018
			JHBMY20.1	Bark, secondary forest	Muyu Town, Hubei	China	0.0033	Duan et al., 2018
			NGS21L.1	Bark, primeval forest	Nangong Mountain, Hubei	China	0.0027	Duan et al., 2018
			FJ11	Waxberry, market	Wuyi Mountain, Fujian	China	0.0049	Duan et al., 2018
	Ecuador/USA	W8	CMP	Tree	Pennsylvania, USA	USA	0.00357951	Peter et al., 2018
			CMQ	Tree	Pennsylvania, USA	USA	0.00428982	Peter et al., 2018
			ACC	Tree	USA	USA	0.00344253	Peter et al., 2018
			CCG	Fruit	Yasuni, Orellana	Ecuador	0.00383532	Peter et al., 2018
			CCD	Flower	Yasuni, Orellana	Ecuador	0.00403977	Peter et al., 2018
			CCC	Flower	Yasuni, Orellana	Ecuador	0.00391532	Peter et al., 2018
			CCH	Insect	Yasuni, Orellana	Ecuador	0.00341668	Peter et al., 2018
			CCI	Insect	Yasuni, Orellana	Ecuador	0.00279737	Peter et al., 2018
			CCF	Insect	Yasuni, Orellana	Ecuador	0.00377648	Peter et al., 2018
			CCE	Flower	Yasuni, Orellana	Ecuador	0.00363013	Peter et al., 2018
	CHN-V (South China forest)	W9	SX9	Tomato, orchard	Qinling Mountain, Shaanxi	China	0.0062	Duan et al., 2018
			ZJ1	Rotten wood, primeval forest	Gutian Mountain, Zhejiang	China	0.0065	Duan et al., 2018
			ZJ2	Rotten wood, primeval forest	Gutian Mountain, Zhejiang	China	0.0063	Duan et al., 2018
			HN13	Rotten wood, primeval forest	Jianfengling Mountain, Hainan	China	0.0054	Duan et al., 2018
			FJ2	Bark of Castanea mollissima, planted tree	Wuyi Mountain, Fujian	China	0.0053	Duan et al., 2018
			FJ3	Bark of Castanea mollissima, planted tree	Wuyi Mountain, Fujian	China	0.0038	Duan et al., 2018
			FJ4	Bark of Castanea mollissima, planted tree	Wuyi Mountain, Fujian	China	0.004	Duan et al., 2018
			HN17	Bark of a Fagaceae tree, primeval forest	Wuzhi Mountain, Hainan	China	0.0044	Duan et al., 2018
			HN15	Rotten wood, primeval forest	Wuzhi Mountain, Hainan	China	0.0067	Duan et al., 2018
			HN16	Forest soil, primeval forest	Wuzhi Mountain, Hainan	China	0.0055	Duan et al., 2018
	CHN-VI/VII (China multiple region forset)	W10	SD1	Persimmon, planted tree	Anqiu, Shandong	China	0.0065	Duan et al., 2018
			YN4	Rotten wood, suburban tree	Dali, Yunnan	China	0.0061	Duan et al., 2018
			YN5	Soil, suburban tree	Dali, Yunnan	China	0.0041	Duan et al., 2018
			BJ4	Intestine of a butterfly, park	Haidian, Beijing	China	0.0061	Duan et al., 2018
			HLJ3	Bark of Quercus mongokica, secondary forest	Jingbo lake, Heilongjiang	China	0.0053	Duan et al., 2018
			HLJ2	Bark of Quercus mongokica, secondary forest	Jingbo lake, Heilongjiang	China	0.0053	Duan et al., 2018
			YN1	Pineapple, orchard	Jinghong, Yunnan	China	0.0066	Duan et al., 2018
			XJ7	Pear, orchard	Korla, Xinjiang	China	0.0053	Duan et al., 2018
			XJ6	Pear, orchard	Korla, Xinjiang	China	0.0046	Duan et al., 2018
			XJ3	Apple, orchard	Korla, Xinjiang	China	0.0062	Duan et al., 2018
			SX10	Persimmon, planted tree	Qinling Mountain, Shaanxi	China	0.0065	Duan et al., 2018
			SX11	Bark of walnut, planted tree	Qinling Mountain, Shaanxi	China	0.0147	Duan et al., 2018
			BJ7	Bark of Pyrus sp., ochard	Shunyi, Beijing	China	0.0052	Duan et al., 2018
			SD2	Bark of Quercus sp., planted tree	Taian, Shandong	China	0.0042	Duan et al., 2018
			SD3	Bark of Quercus sp., planted tree	Taian, Shandong	China	0.0056	Duan et al., 2018
			BJ28	Bark of Castanea sp., secondary forest	Wuling Mountain, Beijing	China	0.0023	Duan et al., 2018
			FJ12	Peach, market	Wuyi Mountain, Fujian	China	0.0082	Duan et al., 2018
			XJ1	Soil, orchard	Xinjiang	China	0.0049	Duan et al., 2018
			JL4	Bark of Pyrus sp., orchard	Yanbian, Jilin	China	0.0036	Duan et al., 2018
			YN6	Bark of Castanopsis orthacantha, suburban tree	Zixi Mountain, Yunnan	China	0.0076	Duan et al., 2018
	Mosaic 2 (China forest)		YN3	Soil, suburban tree	Dali, Yunnan	China	0.0065	Duan et al., 2018
			FJ1	Bark of Castanea mollissima, planted tree	Wuyi Mountain, Fujian	China	0.0063	Duan et al., 2018
	Far East Russia	W11	CDF	Fruit	Botanical garden, Blagoveshchensk	Russia	0.00376784	Peter et al., 2018
			CDG	Wine	Botanical garden, Blagoveshchensk	Russia	0.00332721	Peter et al., 2018
			CDI	Tree	Botanical garden, Blagoveshchensk	Russia	0.00305909	Peter et al., 2018
			CDH	Tree	Botanical garden, Blagoveshchensk	Russia	0.00228641	Peter et al., 2018
	North American Oak	W12	ANF	Soil	Pennsylvania	USA	0.00301349	Peter et al., 2018
			ANH	Nature	Pennsylvania	USA	0.00332043	Peter et al., 2018
			ANG	Soil	Pennsylvania	USA	0.00326786	Peter et al., 2018
			ANI	Soil	Pennsylvania	USA	0.0033872	Peter et al., 2018
			AND	Soil	Pennsylvania	USA	0.00295456	Peter et al., 2018
			AKN	Soil	Pennsylvania	USA	0.00283423	Peter et al., 2018
			ANE	Soil	Pennsylvania	USA	0.00306537	Peter et al., 2018
			SACE_YCU	Tree	Pennsylvania	USA	0.0027311	Peter et al., 2018
			SACE_YBS	Tree	Pennsylvania	USA	0.00270249	Peter et al., 2018
			ACD	Tree	USA	USA	0.00343165	Peter et al., 2018
	Asian Islands	W13	ARH	Fermentation	Java	Indonesia	0.046542	Peter et al., 2018
			ARI	Fermentation	Java	Indonesia	0.0726153	Peter et al., 2018
			CDA	Tree	Sri Lanka	Sri Lanka	0.00312162	Peter et al., 2018
			CCT	Tree	Sri Lanka	Sri Lanka	0.00307503	Peter et al., 2018
			SACE_YCM	Fruit	Philippines	Philippines	0.00283778	Peter et al., 2018
			SACE_YDE	Palm wine	Phillipines	Phillipines	0.00197221	Peter et al., 2018
			AFK	Palm wine	Pakistan	Pakistan	0.00266024	Peter et al., 2018
			AGR	Nature	NA	NA	0.00308565	Peter et al., 2018
			ARG	Tree	Celebes, Sulavesi	Indonesia	0.00339791	Peter et al., 2018
			AHH	Palm wine	Denmark	Denmark	0.00297793	Peter et al., 2018
	African Palm Wine	W14	BAB	Palm wine	Yoboki, Djibouti	Djibouti	0.144163	Peter et al., 2018
			BAD	Palm wine	Yoboki, Djibouti	Djibouti	0.141362	Peter et al., 2018
			BAC	Palm wine	Yoboki, Djibouti	Djibouti	0.139473	Peter et al., 2018
			CFA	Palm wine	Djibouti	Djibouti	0.00345466	Peter et al., 2018
			AKB	Palm wine	Nigeria	Nigeria	0.0400398	Peter et al., 2018
			AKG	Palm wine	Nigeria	Nigeria	0.00340145	Peter et al., 2018
			AKE	Palm wine	Nigeria	Nigeria	0.00304975	Peter et al., 2018
			APR	Beer	West Africa	West Africa	0.00305614	Peter et al., 2018
			SACE_YCV	Beer	West Africa	West Africa	0.0018875	Peter et al., 2018
			CQB	Palm wine	Burkina Faso	Burkina Faso	0.0503532	Peter et al., 2018
			NIGN11	HIBIUS	USI EKIT	Nigeria	0.016564	This study	JAEDTN000000000	SAMN16879050	SRR13317136
			NIGF6	Palm wine	OBA ILE	Nigeria	0.0148172	This study	JAEDTQ000000000	SAMN16879051	SRR13317133
			NIGN9	SWEET POTATO	ADO EKITI	Nigeria	0.124577	This study	JAEDTM000000000	SAMN16879052	SRR13317137
			NIGF10	Palm wine	ADO EKITI	Nigeria	0.0138757	This study	JAEDTX000000000	SAMN16879053	SRR13317127
			NIGF3	Palm wine	AKURE	Nigeria	0.0743429	This study	JAEDTT000000000	SAMN16879054	SRR13317132
			NIGF4	Palm wine	AKURE	Nigeria	0.0145889	This study	JAEDTS000000000	SAMN16879055	SRR13317182
			NIGF7	Palm wine	OMUO-ARAN	Nigeria	0.177765	This study	JAEDTP000000000	SAMN16879056	SRR13317134
			NIGF8	Palm wine	OMUO-ARAN	Nigeria	0.108497	This study	JAEDTO000000000	SAMN16879057	SRR13317135
			NIGF12	KUNNU	KADUNA	Nigeria	0.0154289	This study	JAEDTW000000000	SAMN16879058	SRR13317128
Solid State Fermentation	Mauritius/South Africa	S1	SAN8	Lychee tree	Tshikweta Limpopo province	South Africa	0.18937	This study	JAEDSG000000000	SAMN16879059	SRR13317172
			SAN9	Lychee tree	Tshikweta Limpopo province	South Africa	0.219444	This study	JAEDSF000000000	SAMN16879060	SRR13317173
			MAUN3	Dracaema reflexa (tree)	Casela	Mauritius	0.243335	This study	JAEDTZ000000000	SAMN16879061	SRR13317125
			MAUN5	Dracaema reflexa (tree)	Casela	Mauritius	0.251006	This study	JAEIFF000000000	SAMN16879062	SRR13317106
			MAUF1	Mango Juice	Quatre Bornes	Mauritius	0.232671	This study	JAEDUB000000000	SAMN16879063	SRR13317123
			MAUF2	Mango Juice	Quatre Bornes	Mauritius	0.221008	This study	JAEDUA000000000	SAMN16879064	SRR13317124
	Mantou 1	S2	BT1.1	Fermenting dough	Baotou, Inner Mongolia	China	0.3964	Duan et al., 2018
			BT2.6	Fermenting dough	Baotou, Inner Mongolia	China	0.2805	Duan et al., 2018
			BT2.8	Fermenting dough	Baotou, Inner Mongolia	China	0.3611	Duan et al., 2018
			BT3	Fermenting dough	Baotou, Inner Mongolia	China	0.2895	Duan et al., 2018
			BT4	Fermenting dough	Baotou, Inner Mongolia	China	0.3734	Duan et al., 2018
			WL3	Fermenting dough	Wulanchabu, Inner Mongolia	China	0.3752	Duan et al., 2018
	Mantou 3	S3	JM37.2	Fermenting dough	Hulin, Heilongjiang	China	0.3961	Duan et al., 2018
			GS6	Fermenting dough	Lanzhou, Gansu	China	0.4324	Duan et al., 2018
			QH7.3	Fermenting dough	Minhe, Qinghai	China	0.4301	Duan et al., 2018
			JM4.8	Fermenting dough	Quwo, Shanxi	China	0.4462	Duan et al., 2018
			WL1	Fermenting dough	Wulanchabu, Inner Mongolia	China	0.4181	Duan et al., 2018
			ANGGW.1	Active dry yeast	Yichang, Hubei	China	0.508	Duan et al., 2018
			NX7.1	Fermenting dough	Yinchuan, Ningxia	China	0.3997	Duan et al., 2018
			CJM6.2	Fermenting dough	Yuncheng, Shandong	China	0.4697	Duan et al., 2018
			DJM4.1	Fermenting dough	Yuncheng, Shandong	China	0.4618	Duan et al., 2018
			SXJM1.1	Fermenting dough	Yuncheng, Shanxi	China	0.4401	Duan et al., 2018
			GS1	Fermenting dough	Lanzhou, Gansu	China	0.4658	Duan et al., 2018
	Mantou 5	S4	QH6.5	Fermenting dough	Minhe, Qinghai	China	0.2967	Duan et al., 2018
			QH7.2	Fermenting dough	Minhe, Qinghai	China	0.2708	Duan et al., 2018
			QH7.4	Fermenting dough	Minhe, Qinghai	China	0.2504	Duan et al., 2018
	Mantou 4	S5	QH1.1	Fermenting dough	Qinghai	China	0.2396	Duan et al., 2018
			QH2.1	Fermenting dough	Qinghai	China	0.1997	Duan et al., 2018
			QH3.1	Fermenting dough	Qinghai	China	0.2514	Duan et al., 2018
	Daqu/Baijiu	S6	SCN2	Fermented sorghum grain	Luzhou, Sichuan	China	0.19271	This study	JAEDRB000000000	SAMN16879065	SRR13317084
			SCN6	Daqu (starter) of Baijiu (Chinese liquor)	Luzhou, Sichuan	China	0.211307	This study	JAEDQX000000000	SAMN16879066	SRR13317089
			SCN7	Daqu (starter) of Baijiu (Chinese liquor)	Luzhou, Sichuan	China	0.210132	This study	JAEDQW000000000	SAMN16879067	SRR13317090
			SCN8	Daqu (starter) of Baijiu (Chinese liquor)	Luzhou, Sichuan	China	0.170073	This study	JAEDQV000000000	SAMN16879068	SRR13317091
	Mantou 2	S7	HN1.9	Fermenting dough	Xuchang, Henan	China	0.3813	Duan et al., 2018
			LJM21.10	Fermenting dough	Yanan, Shanxi	China	0.4112	Duan et al., 2018
			LJM6A.1	Fermenting dough	Yanan, Shanxi	China	0.3659	Duan et al., 2018
			CJM21.4	Fermenting dough	Yuncheng, Shandong	China	0.4086	Duan et al., 2018
			WJM5.2	Fermenting dough	Juancheng, Shandong	China	0.3252	Duan et al., 2018
			WJZ1.2	Fermenting dough	Juancheng, Shandong	China	0.3713	Duan et al., 2018
			LJM21.1	Fermenting dough	Yanan, Shanxi	China	0.3367	Duan et al., 2018
			CJM19.5	Fermenting dough	Yuncheng, Shandong	China	0.3578	Duan et al., 2018
			CJM19.6	Fermenting dough	Yuncheng, Shandong	China	0.3118	Duan et al., 2018
			CJM25.5	Fermenting dough	Yuncheng, Shandong	China	0.3469	Duan et al., 2018
	Mosaic 3 (Baijiu)		JSN3	Fermented sorghum grain	Huaian, Jiangsu	China	0.193856	This study	JAEDRF000000000	SAMN16879069	SRR13317080
	Qingkejiu	S8	GZU1	Daqu (starter) of Baijiu (Chinese liquor)	Duyun, Guizhou	China	0.108724	This study	JAEDRP000000000	SAMN16879070	SRR13317069
			HBU1	Fermented sorghum grain	Hubei	China	0.124546	This study	JAEDRO000000000	SAMN16879071	SRR13317070
			GSU1	Daqu (starter) of Baijiu (Chinese liquor)	Tianshui, Gansu	China	0.128969	This study	JAEDRW000000000	SAMN16879072	SRR13317061
			XZ3.1	Daqu (starter) of Qingkejiu (highland barley wine)	Dazi, Tibet	China	0.1001	Duan et al., 2018
			XZ4.2	Daqu (starter) of Qingkejiu (highland barley wine)	Gongbujiangda, Tibet	China	0.0728	Duan et al., 2018
			XZ4.1	Daqu (starter) of Qingkejiu (highland barley wine)	Gongbujiangda, Tibet	China	0.0443	Duan et al., 2018
			XZ10.1	Daqu (starter) of Qingkejiu (highland barley wine)	Gongga, Tibet	China	0.0379	Duan et al., 2018
			XZ2.1	Daqu (starter) of Qingkejiu (highland barley wine)	Lasa, Tibet	China	0.0811	Duan et al., 2018
			XZ7	Daqu (starter) of Qingkejiu (highland barley wine)	Nielamu, Tibet	China	0.0942	Duan et al., 2018
	Sake/Asian Fermentation	S9	CGI	Unknown	Cai Be, South Vietnam	Vietnam	0.0922773	Peter et al., 2018
			CGR	Fermentation	Phan Thiet, South Vietnam	Vietnam	0.0509799	Peter et al., 2018
			SACE_YDA	Palm wine	Newcastle, UK	UK	0.00357164	Peter et al., 2018
			SACE_YDK	Industrial	Thailand	Thailand	0.00427303	Peter et al., 2018
			AHQ	Industrial	Taiwan	China	0.00318926	Peter et al., 2018
			BEF	Fermentation	China	China	0.0790901	Peter et al., 2018
			BHQ	Fermentation	Laos	Laos	0.0615877	Peter et al., 2018
			CLI	Sake	Japan	Japan	0.0327752	Peter et al., 2018
			AFN	Sake	Japan	Japan	0.00276272	Peter et al., 2018
			BTS	Sake	Japan	Japan	0.0415224	Peter et al., 2018
			CLP	Sake	Japan	Japan	0.0131201	Peter et al., 2018
			ADN	Sake	Japan	Japan	0.00289836	Peter et al., 2018
			CLS	Sake	Japan	Japan	0.0128188	Peter et al., 2018
			CMM	Sake	Japan	Japan	0.0208859	Peter et al., 2018
			APC	Sake	Japan	Japan	0.0207516	Peter et al., 2018
			CQQ	Sake	Japan	Japan	0.0169094	Peter et al., 2018
			ARP	Wine	Japan	Japan	0.0219566	Peter et al., 2018
	Huangjiu	S10	FJN1	Fermenting rice	Fujiang	China	0.0109466	This study	JAEDRX000000000	SAMN16879073	SRR13317060
			HQ1.1	Huangjiu (rice wine) starter	Gutian, Fujian	China	0.1162	Duan et al., 2018
			HQ3.1	Huangjiu (rice wine) starter	Gutian, Fujian	China	0.1355	Duan et al., 2018
			CQJZ1.4	Fermented rice	Shaoxing, Zhejiang	China	0.0027	Duan et al., 2018
			SHXU1	Daqu (starter) of Baijiu (Chinese liquor)	Shanxi	China	0.0132712	This study	JAEDQR000000000	SAMN16879074	SRR13317095
			2.1392	Huangjiu (rice wine) starter	Shaoxing, Zhejiang	China	0.0024	Duan et al., 2018
			ZJH2	Fermenting rice	Shaoxing, Zhejiang	China	0.0156695	This study	JAEDQD000000000	SAMN16879075	SRR13317164
			ZJH4	Fermenting rice	Shaoxing, Zhejiang	China	0.0129866	This study	JAEDQB000000000	SAMN16879076	SRR13317064
			JQ10.6	Dry fermented dough	Nanyang, Henan	China	0.12	Duan et al., 2018
			ZJH7	Fermenting rice	Shaoxing, Zhejiang	China	0.121716	This study	JAEDPY000000000	SAMN16879077	SRR13317097
			JM32.3	Huangjiu (rice wine) starter	Bangzhou, Hunan	China	0.0032	Duan et al., 2018
			JM32.8	Huangjiu (rice wine) starter	Bangzhou, Hunan	China	0.003	Duan et al., 2018
			ALH	Nature	Napo, Ecuador	Ecuador	0.0436336	Peter et al., 2018
			BRG	Soil	Constantine	Algeria	0.0422706	Peter et al., 2018
			BJQ1	Fermented sorghum grain	Beijing	China	0.0608356	This study	JAEDSD000000000	SAMN16879078	SRR13317176
			GXU1	Fermenting rice	Guangxi	China	0.0610173	This study	JAEDRV000000000	SAMN16879079	SRR13317062
			HNN1	Fermented sorghum grain	Henan	China	0.0608388	This study	JAEDRL000000000	SAMN16879080	SRR13317073
			JSN2	Fermented sorghum grain	Huaian,Jiangsu	China	0.0662851	This study	JAEDRG000000000	SAMN16879081	SRR13317079
			JSN5	Fermented sorghum grain	Huaian,Jiangsu	China	0.0635451	This study	JAEDRD000000000	SAMN16879082	SRR13317082
			HBU2	Fermented sorghum grain	Hubei	China	0.0623962	This study	JAEDRN000000000	SAMN16879083	SRR13317071
			BQ8.1	Huangjiu (rice wine) starter	Leshan, Sichuan	China	0.0431	Duan et al., 2018
			BQ8.2	Huangjiu (rice wine) starter	Leshan, Sichuan	China	0.0454	Duan et al., 2018
			MJQ3.1	Huangjiu (rice wine) starter	Lishui, Zhejiang	China	0.0372	Duan et al., 2018
			BQ1.1	Huangjiu (rice wine) starter	Longyan, Fujian	China	0.0477	Duan et al., 2018
			MTJZ2	Fermented sorghum grain	Renhuai, Guizhou	China	0.0472	Duan et al., 2018
			MTJZ1	Fermented sorghum grain	Renhuai, Guizhou	China	0.0481	Duan et al., 2018
			SDU1	Fermented sorghum grain	Shandong	China	0.0552285	This study	JAEDQS000000000	SAMN16879084	SRR13317094
			SDN1	Fermented sorghum grain	Shandong	China	0.0597099	This study	JAEDQT000000000	SAMN16879085	SRR13317093
			ZJH1	Fermenting rice	Shaoxing,Zhejiang	China	0.0537698	This study	JAEDQE000000000	SAMN16879086	SRR13317153
			ZJH3	Fermenting rice	Shaoxing,Zhejiang	China	0.0119706	This study	JAEDQC000000000	SAMN16879087	SRR13317175
			ZJH6	Fermenting rice	Shaoxing,Zhejiang	China	0.0499465	This study	JAEDPZ000000000	SAMN16879088	SRR13317086
			XJN2	Fermented sorghum grain	Tachang,Xinjiang	China	0.0608069	This study	JAEDQG000000000	SAMN16879089	SRR13317183
			HN3.8	Fermenting dough	Xuchang, Henan	China	0.049	Duan et al., 2018
			BTP1	Fermenting rice	Yantai, Shandong	China	0.0606	Duan et al., 2018
			ANG.CJ.1	Active dry yeast	Yichang, Hubei	China	0.039	Duan et al., 2018
	Mixed 1	S11	JM28-16	Fermenting dough	Laiwu, Shandong	China	0.0709	Duan et al., 2018
			SAF29	Milk	Eastern Cape	South Africa	0.0740331	This study	JAEDTG000000000	SAMN16879090	SRR13317144
			JSN6	Fermented sorghum grain	Jiangsu	China	0.0116969	This study	JAEDRJ000000000	SAMN16879091	SRR13317076
			ZJH8	Fermenting rice	Shaoxing,Zhejiang	China	0.0136303	This study	JAEDPX000000000	SAMN16879092	SRR13317184
			ZJH5	Fermenting rice	Shaoxing,Zhejiang	China	0.0131242	This study	JAEDQA000000000	SAMN16879093	SRR13317075
			ZJH9	Fermenting rice	Shaoxing,Zhejiang	China	0.0133631	This study	JAEDPW000000000	SAMN16879094	SRR13317185
			SAF28	Milk	Eastern Cape	South Africa	0.0834555	This study	JAEDTH000000000	SAMN16879095	SRR13317143
			SAF27	Milk	Eastern Cape	South Africa	0.0838715	This study	JAEDTI000000000	SAMN16879096	SRR13317141
			MAUN4	Cassine orientalis	Casela	Mauritius	0.0841936	This study	JAEDTY000000000	SAMN16879097	SRR13317126
			JSN7	Daqu (starter) of Baijiu (Chinese liquor)	Jiangsu	China	0.00982987	This study	JAEDRK000000000	SAMN16879098	SRR13317074
			SAN30	Tree	South Africa	South Africa	0.188944	This study	JAEDSM000000000	SAMN16879099	SRR13317166
			SAN32	Tree	South Africa	South Africa	0.183099	This study	JAEDSK000000000	SAMN16879100	SRR13317168
			SAN31	Tree	South Africa	South Africa	0.164363	This study	JAEDSL000000000	SAMN16879101	SRR13317167
			SAN33	Tree	South Africa	South Africa	0.158116	This study	JAEDSJ000000000	SAMN16879102	SRR13317169
			SXQ1	Daqu (starter) of Baijiu (Chinese liquor)	Xinghuacun,Shanxi	China	0.187395	This study	JAEDQP000000000	SAMN16879103	SRR13317098
			BJQ2	Fermented sorghum grain	Beijing	China	0.163766	This study	JAEDSC000000000	SAMN16879104	SRR13317177
			SCN9	Daqu (starter) of Baijiu (Chinese liquor)	Luzhou,Sichuan	China	0.156	This study	JAEDQU000000000	SAMN16879105	SRR13317092
			HLJU1	Daqu (starter) of Baijiu (Chinese liquor)	Mudanjing,Heilongjiang	China	0.150608	This study	JAEDRM000000000	SAMN16879106	SRR13317072
			AHN1	Fermented sorghum grain	Bozhou,Anhui	China	0.0777203	This study	JAEDSE000000000	SAMN16879107	SRR13317174
			SXQ7	Fermented sorghum grain	Xinghuacun,Shanxi	China	0.194961	This study	JAEDQK000000000	SAMN16879108	SRR13317103
			SXQ2	Daqu (starter) of Baijiu (Chinese liquor)	Xinghuacun,Shanxi	China	0.216776	This study	JAEIFE000000000	SAMN16879109	SRR13317105
	Mantou 6	S12	HN5.1	Dry fermented dough	Biyang, Henan	China	0.2148	Duan et al., 2018
			JQ9.4	Fermenting dough	Nanyang, Henan	China	0.2755	Duan et al., 2018
			TY1.4	Fermenting dough	Taiyuan, Shanxi	China	0.2804	Duan et al., 2018
			TY1.5	Fermenting dough	Taiyuan, Shanxi	China	0.2634	Duan et al., 2018
			TY2.1	Fermenting dough	Taiyuan, Shanxi	China	0.2758	Duan et al., 2018
			TY3.9	Fermenting dough	Taiyuan, Shanxi	China	0.2434	Duan et al., 2018
	Mantou 7	S13	JT43.1	Dry fermented dough	Baoji, Shanxi	China	0.0511	Duan et al., 2018
			HN6.1	Dry fermented dough	Biyang, Henan	China	0.0613	Duan et al., 2018
			JTHB1	Dry fermented dough	Chengcheng, Shanxi	China	0.0455	Duan et al., 2018
			JQHG.1	Fermenting dough	Chengcheng, Shanxi	China	0.0408	Duan et al., 2018
			JQ8.4	Fermenting dough	Chengcheng, Shanxi	China	0.0935	Duan et al., 2018
			GZJ2	Fermented sorghum grain	Guizhou	China	0.0842072	This study	JAEDRT000000000	SAMN16879110	SRR13317065
			JMU1	Daqu (starter) of Baijiu (Chinese liquor)	Jinmen	China	0.0101162	This study	JAEDRI000000000	SAMN16879111	SRR13317077
			MTJZ4	Daqu (starter) of Chinese liquor	Renhuai, Guizhou	China	0.1098	Duan et al., 2018
			LJQ13.C7	Fermenting dough	Yanan, Shanxi	China	0.0833	Duan et al., 2018
			CJM24.1	Fermenting dough	Yuncheng, Shandong	China	0.0716	Duan et al., 2018
	Baijiu	S14	AGG	Distillery	Unknown	Unknown	0.0394776	Peter et al., 2018
			SXQ3	Fermented sorghum grain	Xinghuacun,Shanxi	China	0.192446	This study	JAEDQO000000000	SAMN16879112	SRR13317099
			SXQ4	Fermented sorghum grain	Xinghuacun,Shanxi	China	0.158521	This study	JAEDQN000000000	SAMN16879113	SRR13317100
			BJQ5	Fermented sorghum grain	Beijing	China	0.195998	This study	JAEDRZ000000000	SAMN16879114	SRR13317180
			GZLJ3.1	Fermented sorghum grain	Changshun, Guizhou	China	0.1129	Duan et al., 2018
			SCN4	Fermented sorghum grain	Luzhou,Sichuan	China	0.143036	This study	JAEDQZ000000000	SAMN16879115	SRR13317087
			SCN5	Fermented sorghum grain	Luzhou,Sichuan	China	0.107944	This study	JAEDQY000000000	SAMN16879116	SRR13317088
			SCN3	Fermented sorghum grain	Luzhou,Sichuan	China	0.108721	This study	JAEDRA000000000	SAMN16879117	SRR13317085
			SCN1	Fermented sorghum grain	Luzhou,Sichuan	China	0.124359	This study	JAEDRC000000000	SAMN16879118	SRR13317083
			GZJ3	Fermented sorghum grain	Maotai,Guizhou	China	0.0576945	This study	JAEDRS000000000	SAMN16879119	SRR13317066
			GZJ4	Fermented sorghum grain	Maotai,Guizhou	China	0.0868756	This study	JAEDRR000000000	SAMN16879120	SRR13317067
			GZJ5	Fermented sorghum grain	Maotai,Guizhou	China	0.0862702	This study	JAEDRQ000000000	SAMN16879121	SRR13317068
			HLJ10	Fermented sorghum grain	Qiqihaer, Heilongjiang	China	0.1697	Duan et al., 2018
			HLJ201	Fermented sorghum grain	Qiqihaer, Heilongjiang	China	0.1573	Duan et al., 2018
			HLJ59	Fermented sorghum grain	Qiqihaer, Heilongjiang	China	0.1555	Duan et al., 2018
			HLJ4	Fermented sorghum grain	Qiqihaer, Heilongjiang	China	0.191	Duan et al., 2018
			HLJ167	Fermented sorghum grain	Qiqihaer, Heilongjiang	China	0.1728	Duan et al., 2018
			HLJ225	Fermented sorghum grain	Qiqihaer, Heilongjiang	China	0.1526	Duan et al., 2018
			MTJZ3	Daqu (starter) of Baijiu (Chinese liquor)	Renhuai, Guizhou	China	0.0693	Duan et al., 2018
			BJQ4	Fermented sorghum grain	Beijing	China	0.163288	This study	JAEDSA000000000	SAMN16879122	SRR13317179
			XJN1	Fermented sorghum grain	Eehe,Xinjiang	China	0.10719	This study	JAEDQH000000000	SAMN16879123	SRR13317122
			JSN1	Fermented sorghum grain	Huaian,Jiangsu	China	0.191823	This study	JAEDRH000000000	SAMN16879124	SRR13317078
			XJN3	Fermented sorghum grain	Qitai,Xinjiang	China	0.161734	This study	JAEDQF000000000	SAMN16879125	SRR13317142
			SXQ10	Fermented sorghum grain	Xinghuacun,Shanxi	China	0.12883	This study	JAEDQQ000000000	SAMN16879126	SRR13317096
			SXQ9	Fermented sorghum grain	Xinghuacun,Shanxi	China	0.201595	This study	JAEDQI000000000	SAMN16879127	SRR13317111
			SXQ5	Fermented sorghum grain	Xinghuacun,Shanxi	China	0.372304	This study	JAEDQM000000000	SAMN16879128	SRR13317101
			SXQ6	Fermented sorghum grain	Xinghuacun,Shanxi	China	0.47636	This study	JAEDQL000000000	SAMN16879129	SRR13317102
			SXQ8	Fermented sorghum grain	Xinghuacun,Shanxi	China	0.449652	This study	JAEDQJ000000000	SAMN16879130	SRR13317104
			BJQ3	Fermented sorghum grain	Beijing	China	0.154479	This study	JAEDSB000000000	SAMN16879131	SRR13317178
			BJQ6	Fermented sorghum grain	Beijing	China	0.120014	This study	JAEDRY000000000	SAMN16879132	SRR13317181
			HZJZ5.4	Fermented sorghum grain	Heze, Shandong	China	0.1335	Duan et al., 2018
			HZJZ5.5	Fermented sorghum grain	Heze, Shandong	China	0.1334	Duan et al., 2018
			HZJZ4.5	Fermented sorghum grain	Heze, Shandong	China	0.0563	Duan et al., 2018
			MTZ13.12	Soil from a distillery	Maotai, Guizhou	China	0.0586	Duan et al., 2018
			GZLJ3.19	Fermented sorghum grain	Changshun, Guizhou	China	0.0833	Duan et al., 2018
			GZLJ3.22	Fermented sorghum grain	Changshun, Guizhou	China	0.0951	Duan et al., 2018
			GZLJ3.30	Fermented sorghum grain	Changshun, Guizhou	China	0.1014	Duan et al., 2018
			JSN4	Fermented sorghum grain	Huaian,Jiangsu	China	0.13477	This study	JAEDRE000000000	SAMN16879133	SRR13317081
			GZJ1	Daqu (starter) of Baijiu (Chinese liquor)	Maotai,Guizhou	China	0.181521	This study	JAEDRU000000000	SAMN16879134	SRR13317063
Liquid state fermentation	West African Cocoa	L1	CQI	Cocoa bean fermentation	West Africa	West Africa	0.124506	Peter et al., 2018
			CQC	Cocoa bean fermentation	West Africa	West Africa	0.091811	Peter et al., 2018
			CQD	Cocoa bean fermentation	West Africa	West Africa	0.0901424	Peter et al., 2018
			CQH	Cocoa bean fermentation	West Africa	West Africa	0.130936	Peter et al., 2018
			CQL	Cocoa bean fermentation	West Africa	West Africa	0.140304	Peter et al., 2018
			CQM	Cocoa bean fermentation	West Africa	West Africa	0.154458	Peter et al., 2018
			CQK	Cocoa bean fermentation	West Africa	West Africa	0.100249	Peter et al., 2018
			CQN	Cocoa bean fermentation	West Africa	West Africa	0.112525	Peter et al., 2018
			CQE	Cocoa bean fermentation	West Africa	West Africa	0.134386	Peter et al., 2018
			CQP	Cocoa bean fermentation	West Africa	West Africa	0.0864129	Peter et al., 2018
	CHN-VIII (Orchard/ Secondary forest)	L2	BJ5	Apple, orchard	Wuling Mountain, Beijing	China	0.0036	Duan et al., 2018
			BJ11	Rotten wood, secondary forest	Wuling Mountain, Beijing	China	0.0035	Duan et al., 2018
			BJ13	Rotten wood, secondary forest	Wuling Mountain, Beijing	China	0.0024	Duan et al., 2018
			BJ9	Bark of Ulmus sp., secondary forest	Wuling Mountain, Beijing	China	0.0052	Duan et al., 2018
			BJ2	Apple, orchard	Shunyi, Beijing	China	0.0057	Duan et al., 2018
	Mosaic 4 (South Africa)		SAF26	sorghum beer	Eastern Cape	South Africa	0.479481	This study	JAEDTJ000000000	SAMN16879135	SRR13317140
			SAN20	Mavhunda(tree)	Limpopo province	South Africa	0.5109	This study	JAEDSS000000000	SAMN16879136	SRR13317159
	Mosaic 5 (South Africa)		SAN21	Mavhunda(tree)	Limpopo province	South Africa	0.506879	This study	JAEDSR000000000	SAMN16879137	SRR13317160
			SAN10	Lychee tree	Tshikweta, Limpopo province	South Africa	0.49585	This study	JAEDTC000000000	SAMN16879138	SRR13317148
	African Honey Wine	L3	SAN6	Marula (tree)	Shakadza, Limpopo province	South Africa	0.0145632	This study	JAEDSI000000000	SAMN16879139	SRR13317170
			ETPF3	Honey wine	Addis Ababa	Ethiopia	0.237689	This study	JAEDUJ000000000	SAMN16879140	SRR13317114
			ETPF10	Sorghum beer	Addis Ababa	Ethiopia	0.267551	This study	JAEDUP000000000	SAMN16879141	SRR13317107
			SACE_YDB	White Tecc	Ethiopia	Ethiopia	0.00243	Peter et al., 2018
			ETPF9	Honey wine	Gonder	Ethiopia	0.230375	This study	JAEDUF000000000	SAMN16879142	SRR13317118
			ETPF12	Mash	Gonder	Ethiopia	0.298502	This study	JAEDUN000000000	SAMN16879143	SRR13317109
			ETPF13	Honey wine	Lalibela	Ethiopia	0.21652	This study	JAEDUL000000000	SAMN16879144	SRR13317112
			ETPN7	Wheat	Addis Ababa	Ethiopia	0.141347	This study	JAEDUD000000000	SAMN16879145	SRR13317120
			ETPF11	Honey wine	Gonder	Ethiopia	0.18153	This study	JAEDUO000000000	SAMN16879146	SRR13317108
			ETPN8	Geshu leaves	Gonder	Ethiopia	0.128093	This study	JAEDUC000000000	SAMN16879147	SRR13317121
			ETPF1	Honey wine	Lalibela	Ethiopia	0.218685	This study	JAEDUM000000000	SAMN16879148	SRR13317110
			ETPN14	Wheat	Lalibela	Ethiopia	0.138493	This study	JAEDUE000000000	SAMN16879149	SRR13317119
	West African Beer	L4	NIGF1	BURUKUTU	AKURE	Nigeria	0.183712	This study	JAEDTV000000000	SAMN16879150	SRR13317129
			NIGF2	BURUKUTU	AKURE	Nigeria	0.171784	This study	JAEDTU000000000	SAMN16879151	SRR13317130
			AVT	Beer	Abengourou, Ivory Coast	Ivory Coast	0.287292	Peter et al., 2018
			AVP	Beer	Abengourou, Ivory Coast	Ivory Coast	0.282463	Peter et al., 2018
			AVQ	Beer	Abengourou, Ivory Coast	Ivory Coast	0.28793	Peter et al., 2018
			ANM	Beer	Ghana	Ghana	0.266686	Peter et al., 2018
			CES	Bakery	Ghana	Ghana	0.00346308	Peter et al., 2018
			CET	Bakery	Ghana	Ghana	0.00245828	Peter et al., 2018
			NIGF5	BURUKUTU	AKURE	Nigeria	0.126944	This study	JAEDTR000000000	SAMN16879152	SRR13317131
			BEN	Beer	Chad	Chad	0.139953	Peter et al., 2018
	South African Beer	L5	SAF3	Sorghum beer	Shakadza, Limpopo province	South Africa	0.191161	This study	JAEDTF000000000	SAMN16879153	SRR13317145
			SAF4	Sorghum beer	Shakadza, Limpopo province	South Africa	0.199562	This study	JAEDTE000000000	SAMN16879154	SRR13317146
			SAN11	Guava tree	Tshikweta, Limpopo province	South Africa	0.224951	This study	JAEDTB000000000	SAMN16879155	SRR13317149
			SAN12	Lychee tree	Tshikweta, Limpopo province	South Africa	0.247597	This study	JAEDTA000000000	SAMN16879156	SRR13317150
			SAN13	Lychee tree	Tshikweta, Limpopo province	South Africa	0.273035	This study	JAEDSZ000000000	SAMN16879157	SRR13317151
			SAN7	Guava tree	Tshikweta, Limpopo province	South Africa	0.220556	This study	JAEDSH000000000	SAMN16879158	SRR13317171
			AFL	Beer	South Africa	South Africa	0.00262482	Peter et al., 2018
			AEN	Beer	South Africa	South Africa	0.107379	Peter et al., 2018
			ASC	Beer	South Africa	South Africa	0.208372	Peter et al., 2018
			SAN22	Orange tree	Basani, Limpopo province	South Africa	0.472807	This study	JAEDSQ000000000	SAMN16879159	SRR13317161
			SAF1	Sorghum beer	Shakadza, Limpopo province	South Africa	0.458936	This study	JAEDTL000000000	SAMN16879160	SRR13317138
			SAF2	Sorghum beer	Shakadza, Limpopo province	South Africa	0.47958	This study	JAEDTK000000000	SAMN16879161	SRR13317139
			SAF5	Sorghum beer	Shakadza, Limpopo province	South Africa	0.469396	This study	JAEDTD000000000	SAMN16879162	SRR13317147
			SAN19	Guava tree	Tshikweta, Limpopo province	South Africa	0.25958	This study	JAEDST000000000	SAMN16879163	SRR13317158
			SAN16	Guava tree	Tshikweta, Limpopo province	South Africa	0.258083	This study	JAEDSW000000000	SAMN16879164	SRR13317155
			SAN14	Avocado(tree)	Tshikweta, Limpopo province	South Africa	0.252512	This study	JAEDSY000000000	SAMN16879165	SRR13317152
			SAN18	Guava tree	Tshikweta, Limpopo province	South Africa	0.258181	This study	JAEDSU000000000	SAMN16879166	SRR13317157
			SAN15	Guava tree	Tshikweta, Limpopo province	South Africa	0.258405	This study	JAEDSX000000000	SAMN16879167	SRR13317154
			SAN17	Guava tree	Tshikweta, Limpopo province	South Africa	0.259897	This study	JAEDSV000000000	SAMN16879168	SRR13317156
			SAN23	Muhuyu(tree)	Limpopo province	South Africa	0.25892	This study	JAEDSP000000000	SAMN16879169	SRR13317162
	Mediterranean Oak	L6	CCL	Tree	Gelendzhik region, Caucasus	Russia	0.003202	Peter et al., 2018
			BTG	Tree	Portugal, Castelo de Vide,	Portugal	0.00336942	Peter et al., 2018
			BFP	Tree	Montenegro	Montenegro	0.00319325	Peter et al., 2018
			BBS	Soil	Hungary	Hungary	0.0033248	Peter et al., 2018
			BBQ	Soil	Hungary	Hungary	0.00346656	Peter et al., 2018
			CLC	Tree	Bordeaux, France	France	0.00300184	Peter et al., 2018
			CLD	Flower	Bordeaux, France	France	0.00393355	Peter et al., 2018
			CLB	Tree	Bordeaux, France	France	0.00327038	Peter et al., 2018
	Mexican Agave	L7	CPK	Distillery	Tamaulipas, Mexico	Mexico	0.110998	Peter et al., 2018
			CPL	Distillery	Tamaulipas, Mexico	Mexico	0.115779	Peter et al., 2018
			CPQ	Distillery	Tamaulipas, Mexico	Mexico	0.114575	Peter et al., 2018
			CPR	Distillery	Tamaulipas, Mexico	Mexico	0.115991	Peter et al., 2018
			CPN	Distillery	Tamaulipas, Mexico	Mexico	0.114362	Peter et al., 2018
			CPM	Distillery	Tamaulipas, Mexico	Mexico	0.100001	Peter et al., 2018
			CPI	Distillery	Tamaulipas, Mexico	Mexico	0.106831	Peter et al., 2018
	French Guiana	L8	BCE	Human	French Guiana	French Guiana	0.0554907	Peter et al., 2018
			BNB	Fruit	French Guiana	French Guiana	0.0719831	Peter et al., 2018
			BNA	Nature	French Guiana	French Guiana	0.0651425	Peter et al., 2018
			BDS	Human	French Guiana	French Guiana	0.0684005	Peter et al., 2018
			BNC	Fruit	French Guiana	French Guiana	0.0491342	Peter et al., 2018
			BND	Fruit	French Guiana	French Guiana	0.0395779	Peter et al., 2018
			BCG	Human	French Guiana	French Guiana	0.0640825	Peter et al., 2018
			BCC	Human	French Guiana	French Guiana	0.0681129	Peter et al., 2018
			BDT	Human	French Guiana	French Guiana	0.0626886	Peter et al., 2018
			BMR	Nature	French Guiana	French Guiana	0.0427507	Peter et al., 2018
	Milk/Cheese	L9	ARS	Nature	NA	NA	0.157388	Peter et al., 2018
			5-3004	Fermented mare's milk (kumis)	Ulaanbaatar, Mongolia	Mongolia	0.133	Duan et al., 2018
			BGV	Dairy	Alpes, France	France	0.128267	Peter et al., 2018
			ASN	Dairy	Normandy, France	France	0.191282	Peter et al., 2018
			BGD	Dairy	Normandy, France	France	0.130469	Peter et al., 2018
			BGL	Dairy	Normandy, France	France	0.157559	Peter et al., 2018
			BGE	Dairy	Normandy, France	France	0.0661488	Peter et al., 2018
			BFT	Dairy	Normandy, France	France	0.0701253	Peter et al., 2018
			BGP	Dairy	Normandy, France	France	0.144096	Peter et al., 2018
			ALD	Nature	Bolivar, Ecuador	Ecuador	0.131205	Peter et al., 2018
			F3-4	Fermented mare's milk (kumis)	Bayangaole, Inner Mongolia	China	0.1231	Duan et al., 2018
			DX10-3	Fermented yak milk	Dangxiong, Tibet	China	0.2209	Duan et al., 2018
			JZ1-4	Fermented cow milk	Jiangzi, Tibet	China	0.2593	Duan et al., 2018
			NQ13-1	Fermented mixed goat and yak milk	Naqu, Tibet	China	0.2381	Duan et al., 2018
			C5-1	Fermented mare's milk (kumis)	Yili, Xinjiang	China	0.1739	Duan et al., 2018
			B1-1	Fermented mare's milk (kumis)	Yili, Xinjiang	China	0.1182	Duan et al., 2018
			WM7-1	Fermented goat milk	Mongolia	Mongolia	0.0487	Duan et al., 2018
			QH45-2	Fermented yak milk	Haibei prefecture, Qinghai	China	0.2884	Duan et al., 2018
			QH1-3	Fermented yak milk	Hainan prefecture, Qinghai	China	0.2906	Duan et al., 2018
			AQM	Dairy	Italy	Italy	0.0908916	Peter et al., 2018
	ADY/Mixed	L10	BTF	Bakery	NA	NA	0.198856	Peter et al., 2018
			DBL.1	Active dry yeast	Danbao, Guangdong	China	0.398	Duan et al., 2018
			BS	Active dry yeast	Daqing, Heilongjiang	China	0.2268	Duan et al., 2018
			LSF.1	Active dry yeast	Mingguang, Anhui	China	0.3662	Duan et al., 2018
			MLAF.1	Active dry yeast	Yantai, Shandong	China	0.397	Duan et al., 2018
			SXJM4.1	Fermenting dough	Yuncheng, Shanxi	China	0.3916	Duan et al., 2018
			AGK	Nature	UK	UK	0.00325323	Peter et al., 2018
			AMK	Tree	Tuchih, Nantou, Taiwan	China	0.302597	Peter et al., 2018
			AMQ	Tree	Tuchih, Nantou, Taiwan	China	0.302088	Peter et al., 2018
			BCT	Nature	Israel	Israel	0.197449	Peter et al., 2018
			ASP	Unknown	France	France	0.247811	Peter et al., 2018
			AFF	Bakery	France	France	0.00315828	Peter et al., 2018
			AMN	Tree	Tuchih, Nantou, Taiwan	China	0.376683	Peter et al., 2018
			ALN	Water	Bratislava, Deninska Nova Ves	Slovakia	0.220174	Peter et al., 2018
			ALP	Water	Bratislava, Deninska Nova Ves	Slovakia	0.210984	Peter et al., 2018
			CFP	Beer	NA	NA	0.380455	Peter et al., 2018
			ETPF5	Honey wine	Addis Ababa	Ethiopia	0.562506	This study	JAEDUH000000000	SAMN16879170	SRR13317116
			ETPF4	Honey wine	Addis Ababa	Ethiopia	0.538037	This study	JAEDUI000000000	SAMN16879171	SRR13317115
			XST	Active dry yeast	Xiangfan, Hubei	China	0.3559	Duan et al., 2018
			AF	Active dry yeast	Yantai, Shandong	China	0.3942	Duan et al., 2018
			ANG1	Active dry yeast	Yichang, Hubei	China	0.3852	Duan et al., 2018
			AFB.1	Active dry yeast	Yining, Xinjiang	China	0.4131	Duan et al., 2018
			BE006	Beer (Ale refermentation)	Unknown	NA	No data	Gallone et al., 2016
			BE029	Beer (Ale refermentation)	Belgium	Belgium	No data	Gallone et al., 2016
			BR001	Bread	Unknown	NA	No data	Gallone et al., 2016
			BE023	Beer (Ale refermentation)	Belgium	Belgium	No data	Gallone et al., 2016
			BR004	Bread	Belgium	Belgium	No data	Gallone et al., 2016
			BE061	Beer (Alt)	Germany	Germany	No data	Gallone et al., 2016
			WL005	Wild	Denmark	Denmark	No data	Gallone et al., 2016
			WL007	Wild	Denmark	Denmark	No data	Gallone et al., 2016
			BR003	Bread	Belgium	Belgium	No data	Gallone et al., 2016
			BDL	Beer	Equador	Equador	0.23491	Peter et al., 2018
			BE005	Beer (Ale)	Belgium	Belgium	No data	Gallone et al., 2016
			CHK	Beer	UK	UK	0.23652	Peter et al., 2018
			BML	Human, clinical	Belgium	Belgium	0.384402	Peter et al., 2018
			CLA	Human, clinical	France	France	0.394292	Peter et al., 2018
	Mosaic beer		CFC	Beer	Westmalle, Belgium	Belgium	0.327976	Peter et al., 2018
	Beer 1	L11.1 Belgium/Germany Beer	BBG	Water	Devinska Nova Ves	Slovakia	0.226696	Peter et al., 2018
			ASH	Beer	Netherlands	Netherlands	0.221882	Peter et al., 2018
			AEB	Beer	Oranjeboom brewery, Rotterdam	Netherlands	0.246747	Peter et al., 2018
			BE073	Beer (Hefeweizen)	Germany	Germany	No data	Gallone et al., 2016
			BE008	Beer (Ale)	Germany	Germany	No data	Gallone et al., 2016
			CGC	Fruit	Davis, CA, UCD	Canda	0.284678	Peter et al., 2018
			SP005	Spirits	Brazil	Brazil	No data	Gallone et al., 2016
			BE026	Beer (Ale refermentation)	Belgium	Belgium	No data	Gallone et al., 2016
			BE076	Beer (Wheat)	Belgium	Belgium	No data	Gallone et al., 2016
			BE077	Beer (Trappist)	Belgium	Belgium	No data	Gallone et al., 2016
			BE078	Beer (Trappist)	Belgium	Belgium	No data	Gallone et al., 2016
			BE016	Beer	Belgium	Belgium	No data	Gallone et al., 2016
			BRQ	Beer	Belgium	Belgium	0.258374	Peter et al., 2018
			BSI	Beer	Belgium	Belgium	0.242896	Peter et al., 2018
			BE043	Beer (Lager)	Belgium	Belgium	No data	Gallone et al., 2016
			BE015	Beer	Belgium	Belgium	No data	Gallone et al., 2016
			AQT	Beer	Belgium	Belgium	0.199522	Peter et al., 2018
		L11.2 US Beer	BE051	Beer	East Coast	USA	No data	Gallone et al., 2016
			BE102	Beer	USA	USA	No data	Gallone et al., 2016
			BE007	Beer (Ale)	USA	USA	No data	Gallone et al., 2016
			BE044	Beer (Pale ale)	California	USA	No data	Gallone et al., 2016
			BE068	Beer (Pale ale)	California	USA	No data	Gallone et al., 2016
			BE098	Beer (Pale ale)	California	USA	No data	Gallone et al., 2016
			BE065	Beer	California	USA	No data	Gallone et al., 2016
			BE071	Beer	San Diego	USA	No data	Gallone et al., 2016
			BE067	Beer	England	UK	No data	Gallone et al., 2016
			BE082	Beer	Belgium	Belgium	No data	Gallone et al., 2016
		L11.3 Britain Beer	BE099	Beer (Bitter)	England	UK	No data	Gallone et al., 2016
			BE069	Beer	California	USA	No data	Gallone et al., 2016
			BE054	Beer	England	UK	No data	Gallone et al., 2016
			BE064	Beer	England	UK	No data	Gallone et al., 2016
			BE101	Beer	England	UK	No data	Gallone et al., 2016
			BE100	Beer	England	UK	No data	Gallone et al., 2016
			BE048	Beer (Pale ale)	England	UK	No data	Gallone et al., 2016
			BE047	Beer (Stout)	Ireland	Ireland	No data	Gallone et al., 2016
			BE089	Beer	Germany	Germany	No data	Gallone et al., 2016
			BE001	Beer	Belgium	Belgium	No data	Gallone et al., 2016
			BE036	Beer (Trappist)	Belgium (UK origin)	Belgium	No data	Gallone et al., 2016
			AAC	Beer	England	UK	0.164005	Peter et al., 2018
			ATV	Beer	UK	UK	0.300732	Peter et al., 2018
			CFH	Beer	UK	UK	0.266459	Peter et al., 2018
	Beer 2/Mosaic Beer	L12	SACE_YDD	Fermentation	Missouri, USA	USA	0.00225164	Peter et al., 2018
			BE063	Beer	England	UK	No data	Gallone et al., 2016
			SACE_YAB	Distillery	NA	NA	0.00185962	Peter et al., 2018
			AIG	Beer	NA	NA	0.00272748	Peter et al., 2018
			AEQ	Beer	Japan	Japan	0.00318527	Peter et al., 2018
			AAR	Beer	Ireland	Ireland	0.00264518	Peter et al., 2018
			BE091	Beer (Lager)	Germany	Germany	No data	Gallone et al., 2016
			BE039	Beer (Lager)	Czech	Czech	No data	Gallone et al., 2016
			BE021	Beer (Pale ale)	Canada	Canada	No data	Gallone et al., 2016
			BE002	Beer	Bulgaria	Bulgaria	No data	Gallone et al., 2016
			AEA	Industrial	Sao Paulo	Brazil	0.00275531	Peter et al., 2018
			BE034	Beer (Saison)	Belgium	Belgium	No data	Gallone et al., 2016
			BE013	Beer (Ale refermentation)	Belgium	Belgium	No data	Gallone et al., 2016
			BE011	Beer (Abbey)	Belgium	Belgium	No data	Gallone et al., 2016
			BE080	Beer	Belgium	Belgium	No data	Gallone et al., 2016
			BE085	Beer (Strong ale)	Belgium	Belgium	No data	Gallone et al., 2016
			CFF	Beer	Belgium	Belgium	0.145454	Peter et al., 2018
			AAB	Beer	Odessa	Ukraine	0.0020385	Peter et al., 2018
			ASB	Human, clinical	NA	NA	0.174953	Peter et al., 2018
			APP	Beer	Brazil, Rio de Janeiro	Brazil	0.145501	Peter et al., 2018
	Mosaic Honey Wine		ETPF2	Honey wine	Addis Ababa	Ethiopia	0.329375	This study	JAEDUK000000000	SAMN16879172	SRR13317113
			ETPF6	Honey wine	Addis Ababa	Ethiopia	0.329791	This study	JAEDUG000000000	SAMN16879173	SRR13317117
	Brazilian Bioethanol	L13	AGM	Industrial	Sao Paulo, Brazil	Brazil	0.00288476	Peter et al., 2018
			APG	Bioethanol	Araras, Sao Paulo	Brazil	0.00270766	Peter et al., 2018
			CNE	Bioethanol	Brazil	Brazil	0.192488	Peter et al., 2018
			BVG	Bioethanol	Brazil	Brazil	0.193375	Peter et al., 2018
			CNL	Bioethanol	Brazil	Brazil	0.198985	Peter et al., 2018
			CNB	Bioethanol	Brazil	Brazil	0.199974	Peter et al., 2018
			CMT	Bioethanol	Brazil	Brazil	0.109168	Peter et al., 2018
			CNI	Bioethanol	Brazil	Brazil	0.151855	Peter et al., 2018
			APH	Distillery	Pirassununga, Sao Paulo	Brazil	0.133173	Peter et al., 2018
			AFR	Industrial	Sao Paulo	Brazil	0.00317155	Peter et al., 2018
	Wine/European	L14.1 Spain Wine	AET	Wine	Spain	Spain	0.00229111	Peter et al., 2018
			AEK	Wine	Spain	Spain	0.00284564	Peter et al., 2018
			ASA	Wine	Spain	Spain	0.0401855	Peter et al., 2018
			AHP	Wine	Spain	Spain	0.0241495	Peter et al., 2018
			AQE	Wine	Spain	Spain	0.0214023	Peter et al., 2018
			AQP	Wine	Spain	Spain	0.0187362	Peter et al., 2018
			AAK	Wine	Spain	Spain	0.00239771	Peter et al., 2018
			BPL	Wine	Piave, Italy	Italy	0.0318865	Peter et al., 2018
			AIP	Wine	Umbria, Italy	Italy	0.0395961	Peter et al., 2018
			CAN	Wine	Georgia	Georgia	0.0386306	Peter et al., 2018
		L14.2 Alpechin	CPG	Nature	Aceituna, Spain	Spain	0.0038923	Peter et al., 2018
			BRK	Industrial	Spain	Spain	0.00338171	Peter et al., 2018
			SACE_YBR	Industrial	Spain	Spain	0.00938626	Peter et al., 2018
			AQA	Industrial	Spain	Spain	0.024067	Peter et al., 2018
			AQD	Industrial	Spain	Spain	0.0202401	Peter et al., 2018
			ABM	Industrial	Spain	Spain	0.00288602	Peter et al., 2018
			AVB	Industrial	Spain	Spain	0.00352851	Peter et al., 2018
			AIE	Human	Portugal	Portugal	0.00244674	Peter et al., 2018
			CGD	Fruit	Davis, CA, UCD	Canada	0.0038346	Peter et al., 2018
			CGE	Fruit	Davis, CA, UCD, Pilot plant	Canada	0.00331086	Peter et al., 2018
		L14.3 Chinese/African Orchard	SAN25	Oak tree	Western Cape	South Africa	0.021748	This study	JAEDSN000000000	SAMN16879174	SRR13317165
			SAN24	Oak tree	Western Cape	South Africa	0.0768889	This study	JAEDSO000000000	SAMN16879175	SRR13317163
			NX2	Soil, mulberry field	Helan Mountain, Ningxia	China	0.0026	Duan et al., 2018
			NX1	Soil, melonry	Zhongwei, Ningxia	China	0.0023	Duan et al., 2018
			NX3	Soil, melonry	Zhongwei, Ningxia	China	0.0019	Duan et al., 2018
			XJ5	Grape, vineyard	Korla, Xinjiang	China	0.003	Duan et al., 2018
		L14.4 Wine/European	ABE	Human, clinical	NA	NA	0.00200431	Peter et al., 2018
			BPB	Wine	Illasi, Verona, Italy	Italy	0.00294497	Peter et al., 2018
			BFC	Fermentation	Slovenia	Slovenia	0.00242601	Peter et al., 2018
			BPT	Wine	Recioto, Verona, Italy	Italy	0.0338812	Peter et al., 2018
			SACE_YAM	Human, clinical	NA	NA	0.00470118	Peter et al., 2018
			AGL	Wine	France	Finland	0.00342084	Peter et al., 2018
			ABQ	Soil	Finland	Finland	0.0019952	Peter et al., 2018
			ABR	Soil	Finland	Finland	0.00216293	Peter et al., 2018
			BNV	Soil	Turku, Finland	Dalmatia	0.00230065	Peter et al., 2018
			BKI	Wine	Dalmatia	Greece	0.00219361	Peter et al., 2018
			BQA	Wine	Greece	Slovakia	0.0025141	Peter et al., 2018
			BBI	Flower	Male Levare, Slovakia	Slovakia	0.00288952	Peter et al., 2018
			ALS	Flower	Male levare, Slovakia	Slovakia	0.00259046	Peter et al., 2018
			ALT	Flower	Male Zaluzie, Slovakia	Slovakia	0.00250313	Peter et al., 2018
			BBK	Flower	Male Zaluzie, Slovakia	Slovakia	0.00282442	Peter et al., 2018
			AMA	Fruit	Male Zaluzie, Slovakia	Slovakia	0.0646544	Peter et al., 2018
			ALQ	Tree	Male Zaluzie, Slovakia	Slovakia	0.00273412	Peter et al., 2018
			BFB	Nature	Slovenia	Slovenia	0.0578551	Peter et al., 2018
			BFD	Fruit	Slovenia	Slovenia	0.00310346	Peter et al., 2018
			ACP	Wine	Russia	Russia	0.0027898	Peter et al., 2018
		L14.5 French Clinical	BMN	Human, clinical	Vall d'Hebron hospital, Barcelona	Spain	0.0190529	Peter et al., 2018
			CKL	Human, clinical	Amiens, France	France	0.0196434	Peter et al., 2018
			CKQ	Human, clinical	France	France	0.018471	Peter et al., 2018
			CKH	Industrial	Paris, France	France	0.0198304	Peter et al., 2018
			CKP	Human, clinical	Paris, France	France	0.0178078	Peter et al., 2018
			CIT	Human, clinical	Paris, France	France	0.018009	Peter et al., 2018
			CKD	Human, clinical	Paris, France	France	0.0194267	Peter et al., 2018
			CKE	Human, clinical	Paris, France	France	0.0190297	Peter et al., 2018
			CIS	Human, clinical	Paris, France	France	0.0187762	Peter et al., 2018
			CKI	Human, clinical	Brussels, Belgium	Belgium	0.0193969	Peter et al., 2018
		L14.6 Italian Clinical	ADD	Soil	Illinois, USA	USA	0.00199607	Peter et al., 2018
			SACE_YAZ	Human, clinical	Italy	Italy	0.00143694	Peter et al., 2018
			SACE_YBE	Human, clinical	Italy	Italy	0.00334704	Peter et al., 2018
			BMH	Human, clinical	Italy	Italy	0.00209478	Peter et al., 2018
			SACE_YBA	Human, clinical	Italy	Italy	0.00169041	Peter et al., 2018
			ADI	Human, clinical	Italy	Italy	0.00198953	Peter et al., 2018
			BMK	Human, clinical	Italy	Italy	0.0022455	Peter et al., 2018
			SACE_YAY	Human, clinical	Italy	Italy	0.00441175	Peter et al., 2018
			SACE_YBF	Human, clinical	Italy	Italy	0.00148133	Peter et al., 2018
			BMI	Human, clinical	Italy	Italy	0.0025376	Peter et al., 2018
